# Supplementary material
Source: MDPI journal article supplement (https://www.mdpi.com/2673-7078/4/2/20)
Supplement: s1 [file s1]

**Table S1.** Summary of motion data at the lower extremity joint (hip, knee, ankle) angles of the rear leg viewed from the sagittal plane (N=15; in degrees).

| Target distance condition  |       |   |      |         |   |     |       |   |     |         |         |                      |             |
|----------------------------|-------|---|------|---------|---|-----|-------|---|-----|---------|---------|----------------------|-------------|
| Variable                   | Short |   |      | Neutral |   |     | Long  |   |     | F       | P value |                      | Effect size |
|                            |       |   |      |         |   |     |       |   |     |         | ANOVA   | Pairwise comparisons |             |
| <u>Rear Hip</u>            |       |   |      |         |   |     |       |   |     |         |         |                      |             |
| Peak flexion angle         | 10.9  | ± | 9.6  | 11.4    | ± | 9.2 | 14.7  | ± | 9.8 | 5.381   | .011    | S-N: .1000           | .278        |
|                            |       |   |      |         |   |     |       |   |     |         |         | S-L: .085            |             |
|                            |       |   |      |         |   |     |       |   |     |         |         | N-L: .015            |             |
| Peak extension angle       | 5.6   | ± | 9.8  | -4.8    | ± | 6.3 | -9.9  | ± | 5.9 | 46.431  | < .001  | S-N: < .001          | .768        |
|                            |       |   |      |         |   |     |       |   |     |         |         | S-L: < .001          |             |
|                            |       |   |      |         |   |     |       |   |     |         |         | N-L: .002            |             |
| Range of motion            | 5.2   | ± | 5.5  | 16.2    | ± | 6.3 | 24.6  | ± | 6.8 | NA      | < .001† | S-N: .011            | .871#       |
|                            |       |   |      |         |   |     |       |   |     |         |         | S-L: < .001          |             |
|                            |       |   |      |         |   |     |       |   |     |         |         | N-L: .011            |             |
| <u>Rear Knee</u>           |       |   |      |         |   |     |       |   |     |         |         |                      |             |
| Peak flexion angle         | 51.5  | ± | 8.5  | 57.6    | ± | 5.8 | 60.6  | ± | 4.9 | 27.300  | < .001  | S-N: .001            | .661        |
|                            |       |   |      |         |   |     |       |   |     |         |         | S-L: < .001          |             |
|                            |       |   |      |         |   |     |       |   |     |         |         | N-L: .001            |             |
| Peak extension angle       | 37.5  | ± | 13.9 | 13.5    | ± | 8.4 | 5.4   | ± | 5.7 | 58.529  | < .001  | S-N: < .001          | .807        |
|                            |       |   |      |         |   |     |       |   |     |         |         | S-L: < .001          |             |
|                            |       |   |      |         |   |     |       |   |     |         |         | N-L: .006            |             |
| Range of motion            | 14.0  | ± | 12.3 | 44.1    | ± | 7.4 | 55.2  | ± | 6.6 | NA      | < .001† | S-N: .006            | 1.000#      |
|                            |       |   |      |         |   |     |       |   |     |         |         | S-L: < .001          |             |
|                            |       |   |      |         |   |     |       |   |     |         |         | N-L: .006            |             |
| <u>Rear Ankle</u>          |       |   |      |         |   |     |       |   |     |         |         |                      |             |
| Peak dorsiflexion angle    | 31.2  | ± | 3.0  | 32.4    | ± | 3.2 | 33.9  | ± | 3.4 | 7.308   | .003    | S-N: .504            | .343        |
|                            |       |   |      |         |   |     |       |   |     |         |         | S-L: .013            |             |
|                            |       |   |      |         |   |     |       |   |     |         |         | N-L: .014            |             |
| Peak plantar flexion angle | 22.1  | ± | 6.4  | 3.7     | ± | 8.6 | -16.6 | ± | 9.7 | 128.637 | < .001  | S-N: < .001          | .902        |
|                            |       |   |      |         |   |     |       |   |     |         |         | S-L: < .001          |             |
|                            |       |   |      |         |   |     |       |   |     |         |         | N-L: < .001          |             |
| Range of motion            | 9.1   | ± | 7.4  | 28.7    | ± | 8.4 | 50.5  | ± | 9.0 | NA      | < .001† | S-N: .006            | 1.000#      |
|                            |       |   |      |         |   |     |       |   |     |         |         | S-L: < .001          |             |
|                            |       |   |      |         |   |     |       |   |     |         |         | N-L: .006            |             |



|               |      |   |     |       |   |     |       |   |     |        |        |             |      |
|---------------|------|---|-----|-------|---|-----|-------|---|-----|--------|--------|-------------|------|
| Peak          |      |   |     |       |   |     |       |   |     |        |        | S-N: .392   |      |
| dorsiflexion  | 3.1  | ± | 4.8 | 0.8   | ± | 6.4 | 1.5   | ± | 9.4 | .997   | .347   | S-L: 1.000  | .066 |
| angle         |      |   |     |       |   |     |       |   |     |        |        | N-L: 1.000  |      |
| Peak plantar  |      |   |     |       |   |     |       |   |     |        |        | S-N: < .001 |      |
| flexion angle | -5.9 | ± | 4.7 | -13.7 | ± | 5.7 | -19.1 | ± | 5.6 | 67.011 | < .001 | S-L: < .001 | .827 |
|               |      |   |     |       |   |     |       |   |     |        |        | N-L: < .001 |      |
| Range of      |      |   |     |       |   |     |       |   |     |        |        | S-N: < .001 |      |
| motion        | 23.0 | ± | 7.3 | 35.7  | ± | 7.4 | 43.4  | ± | 6.9 | 98.514 | < .001 | S-L: < .001 | .876 |
|               |      |   |     |       |   |     |       |   |     |        |        | N-L: < .001 |      |

---

Data are presented in Mean ± SD format. Hip, Knee, + = flexion / - = extension; Ankle, + = dorsiflexion / - = plantar flexion. F, F-values; ANOVA, analysis of variance; †, Friedman's test was applied because normal distribution was not given; #, the Kendall's W test value.
